# Supplementary material
Source: PubMed Central journal article supplement (PMC3743663)
Supplement: NIHMS459305-supplement-Supp_Figure_1-2.pdf [file NIHMS459305-supplement-Supp_Figure_1-2.pdf]

Supplemental Figure 1: REMARK Diagram for MA.12 Trial and Biospecimens

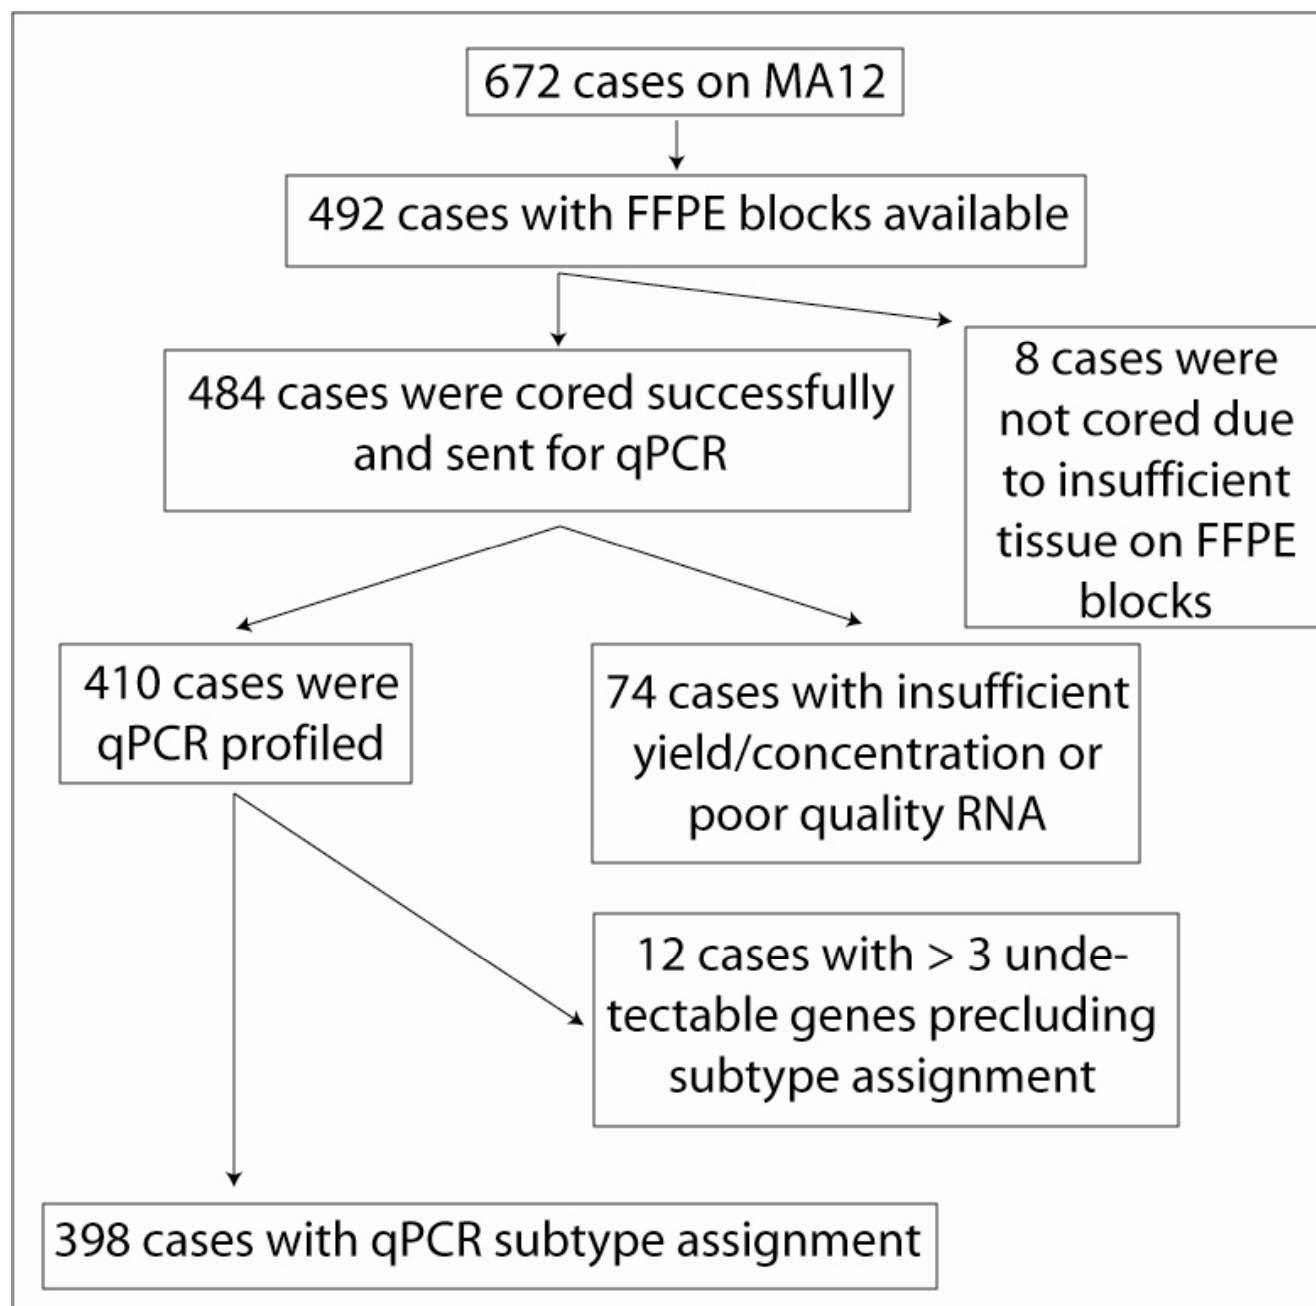

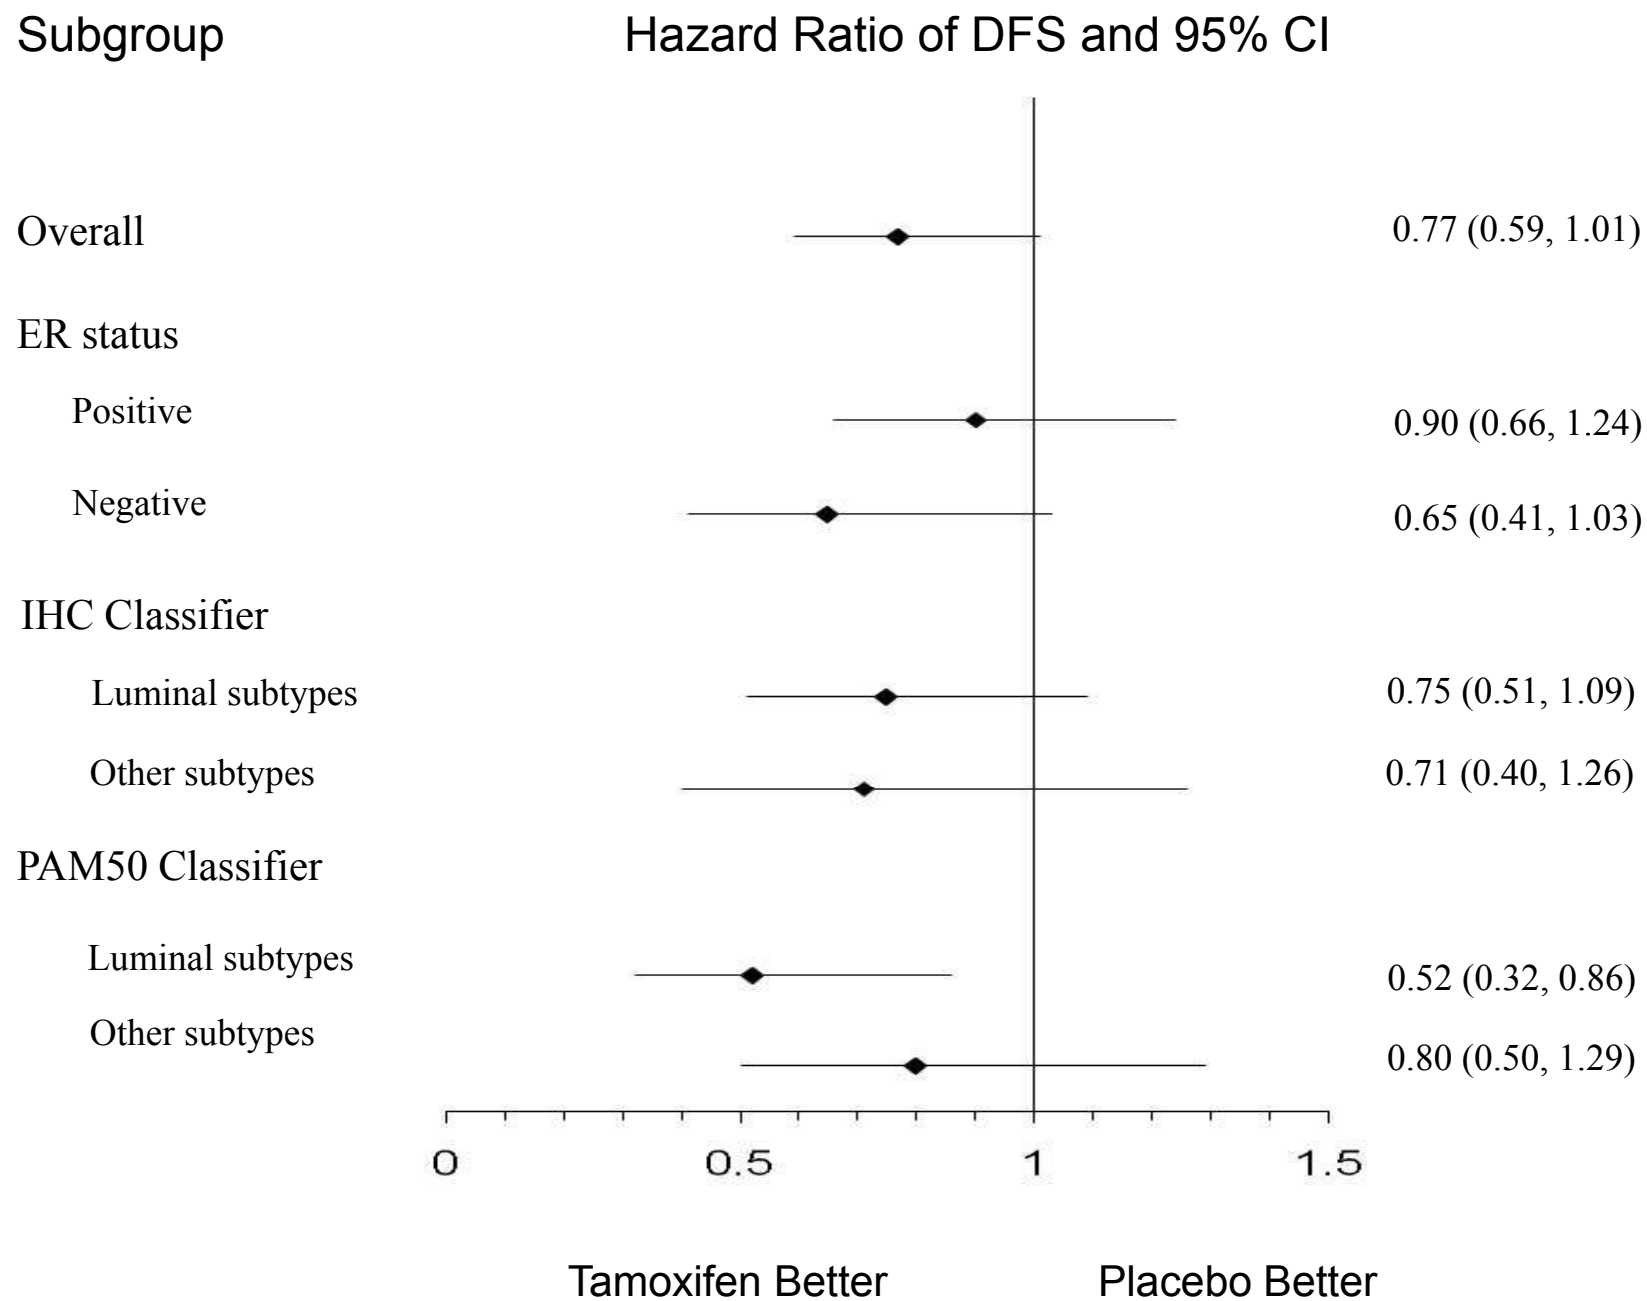

Supplemental Figure 2: Forest plot for Disease free Survival across various Classifiers
