# Supplementary material
Source: PubMed Central journal article supplement (PMC3743663)
Supplement: NIHMS459305-supplement-Supp_table_1-2.pdf [file NIHMS459305-supplement-Supp_table_1-2.pdf]

## Supplemental Materials – Tables

Supplemental Table 1: Intrinsic subtype definitions by immunohistochemistry.

| Antibody                                           | Dilution and Incubation Time        | Antigen Retrieval Methods      | Definition of positive stain on invasive breast cancer cells |
|----------------------------------------------------|-------------------------------------|--------------------------------|--------------------------------------------------------------|
| ER: SP 1 (ThermoFisher Scientific, Fremont, CA)    | 1:50 dilution for 32 min with heat  | Mild CC1 on Ventana BenchMark  | > 1%                                                         |
| PR: 1E2 (Ventana, Tuscon, AZ)                      | Pre-diluted for 8 min with heat     | Std CC1 on Ventana DiscoveryXT | > 1%                                                         |
| HER 2: SP 3 (ThermoFisher Scientific, Fremont, CA) | 1:500 dilution for 32 min with heat | Mild CC1 on Ventana BenchMark  | IHC 3+, or if IHC is 2+, then FISH<br>HER2/CEP17 > 2.0       |
| Ki67: SP 6 (Neomarkers)                            | 1:200 dilution for 32 min with heat | Mild CC1 on Ventana BenchMark  | IHC >13%                                                     |
| EGFR: DAKO PharmDX kit                             | Pre-diluted for 30 min              | Proteinase K for 5 min         | any staining above background                                |
| CK 5/6: D5/16B4 (Zymed)                            | 1:100 dilution for 32 min with heat | Mild CC1 on Ventana BenchMark  | any staining above background                                |

Luminal A = (ER or PR) positive AND HER2 negative AND Ki67  $\leq$ 13%

Luminal B = (ER or PR) positive AND (HER2 positive or Ki67 >13%)

(pure) HER2+ = ER negative AND PR negative AND HER2 positive

Core Basal = ER, PR AND HER 2 negative AND (CK5/6 or EGFR) positive

Supplemental Table 2: C-Index for Risk-of-Relapse (ROR) Scores

| ROR Score | Definition of scores                                            | C-index (95% CI)   |                    |
|-----------|-----------------------------------------------------------------|--------------------|--------------------|
|           |                                                                 | DFS                | OS                 |
| ROR-S     | Subtype Only                                                    | 57.9% (53.6-63.0%) | 62.5% (57.6-67.8%) |
| ROR-P     | Subtype with Proliferation Signature Index                      | 55.9% (50.5-60.0%) | 60.0% (54.7-65.0%) |
| ROR-T     | Subtype with Tumour Size                                        | 59.8% (54.8-64.2%) | 63.1% (57.9-68.2%) |
| ROR-PT    | Subtype with Both Proliferation Signature Index and Tumour Size | 57.6% (52.5-62.1%) | 61.1% (55.8-66.3%) |
